# Supplementary material for: Mitochondrial protein E2F3d, a distinctive E2F3 product, mediates hypoxia-induced mitophagy in cancer cells
Source: PubMed Central journal article supplement (PMC6318215; doi:10.1038/s42003-018-0246-9), 2019-01-03

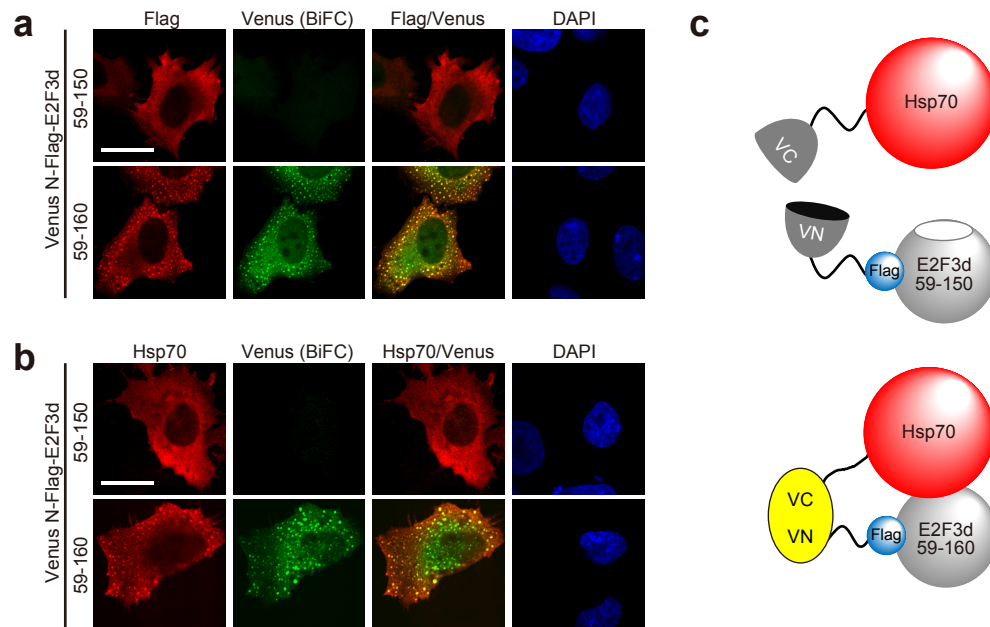

**Supplementary Figure 1.** E2F3d interacts with Hsp70. **a**, **b** HeLa cells were co-transfected with constructs for Flag-tagged E2F3d deletion mutants fused to the N-terminal fragment of Venus (VN) and Hsp70 fused to the C-terminal fragment of Venus (VC). Cells were then immunostained with anti-Flag antibody (**a**) or anti-Hsp70 antibody (**b**). Scale bar, 20  $\mu$ m. **c** Schematic representation of the BiFC-negative and BiFC-positive combination of E2F3d deletion mutants and Hsp70.

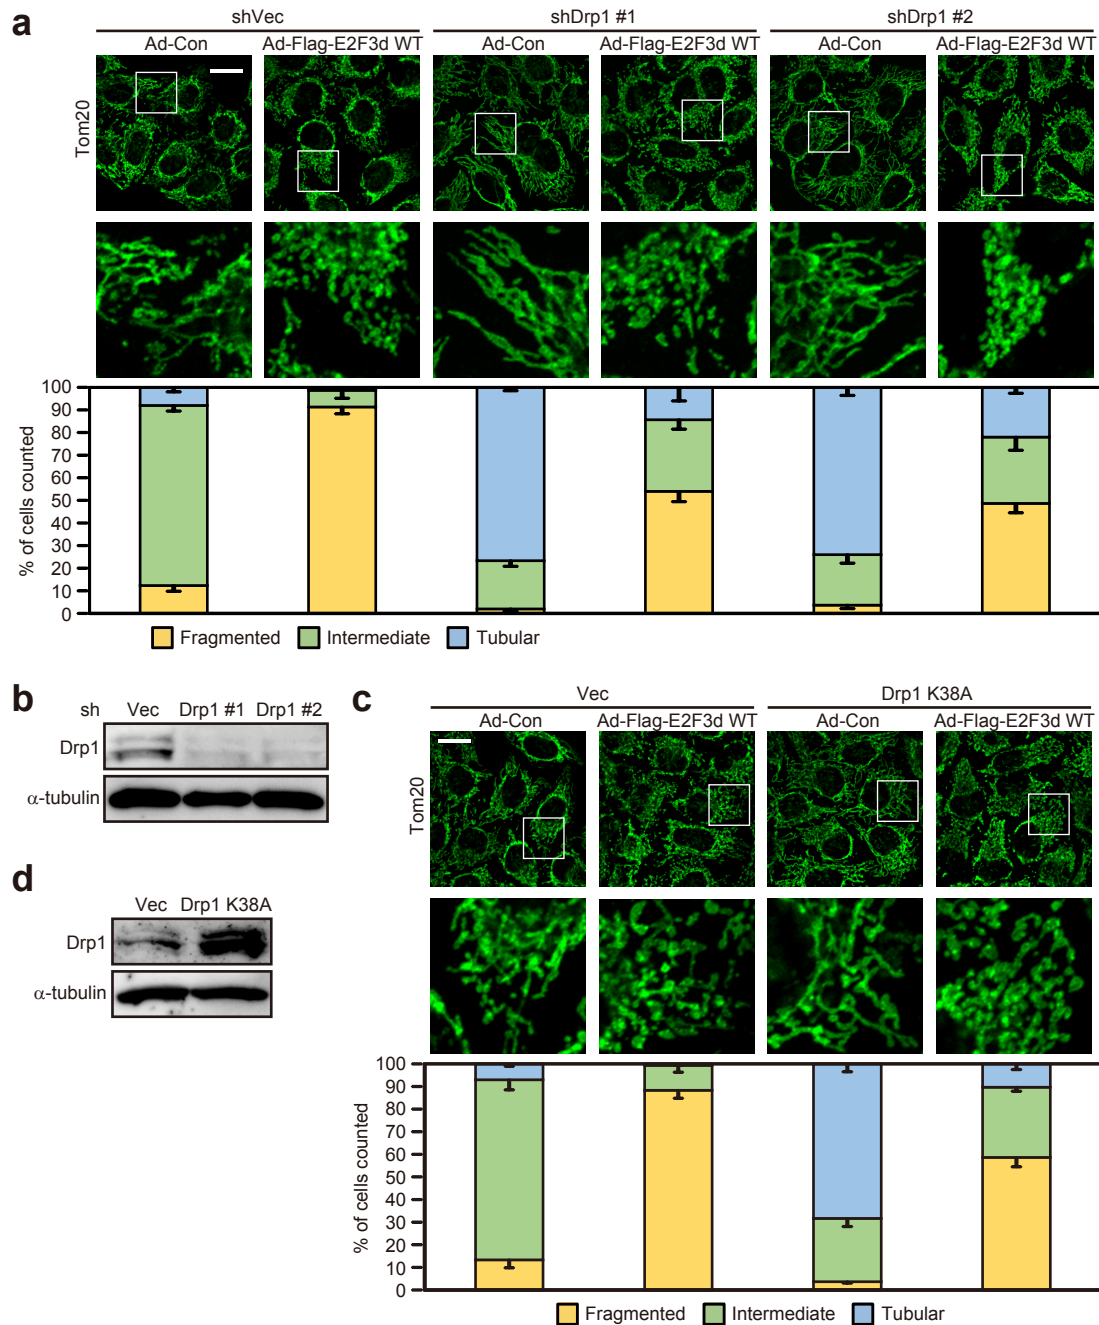

**Supplementary Figure 2.** Drp1 does not play a crucial role in E2F3d-induced mitochondrial fragmentation. **a, b** HeLa cells were infected with control shRNA retrovirus (shVec) or retroviruses expressing shRNA against human *Drp1* (shDrp1 #1 or shDrp1 #2). **a** Cells were infected with control adenovirus (Ad-Con) or adenovirus expressing Flag-tagged WT E2F3d (Ad-Flag-E2F3d WT) and then immunostained with anti-Tom20 antibody. The bottom images show magnifications of the boxed areas in the top images. Scale bar, 20  $\mu$ m. The graph shows the percentage of cells exhibiting fragmented, intermediate, or tubular mitochondrial morphologies. Data are presented as the mean of three independent experiments ( $\geq 100$  cells). Error bars represent SD. **b** Depletion of Drp1 protein was verified by immunoblotting. **c, d** HeLa cells were infected with control retrovirus (Vec) or retrovirus expressing a dominant-negative Drp1 mutant (Drp1 K38A). **c** Cells were analyzed as described in **a**. **d** The expression of Drp1 protein was examined by immunoblotting.

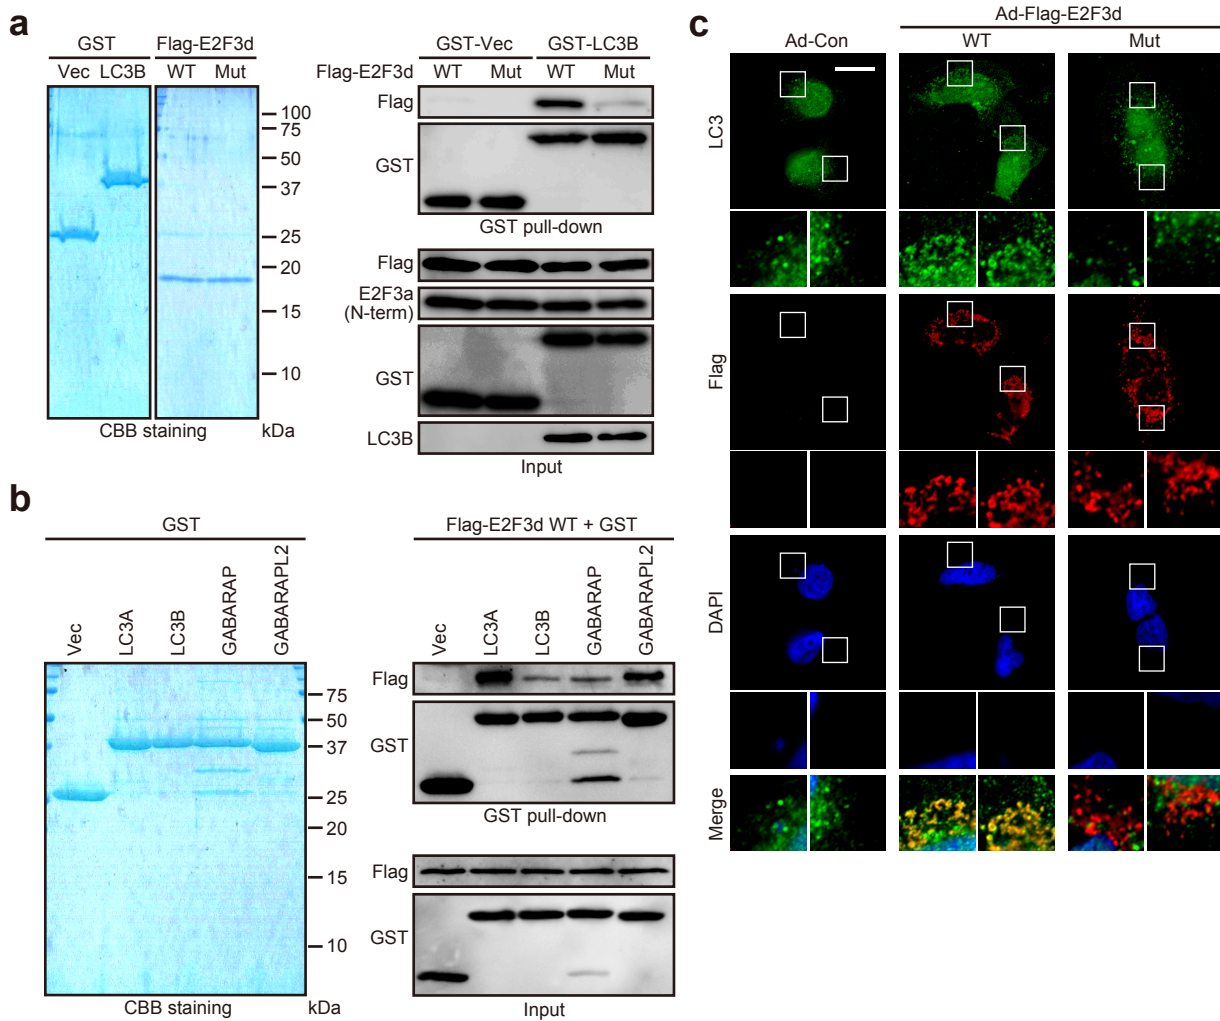

**Supplementary Figure 3.** E2F3d interacts with LC3. **a** The purity of GST and GST-LC3B proteins and Flag-tagged WT and LIR mutant (Mut) E2F3d proteins were evaluated by SDS-PAGE, followed by Coomassie Brilliant Blue (CBB) staining (left). Purified Flag-tagged E2F3d proteins were incubated with immobilized GST or GST-LC3B beads and the co-precipitated proteins were analyzed by immunoblotting (right). **b** GST fusion proteins of human ATG8 homologs were analyzed as described in **a**. **c** HeLa cells were infected with control adenovirus (Ad-Con) or adenoviruses expressing Flag-tagged WT or LIR mutant E2F3d (Ad-Flag-E2F3d WT or Mut). Cells were immunostained with anti-Flag and anti-LC3 antibodies. The boxed areas are shown at higher magnification. Scale bar, 20  $\mu$ m.

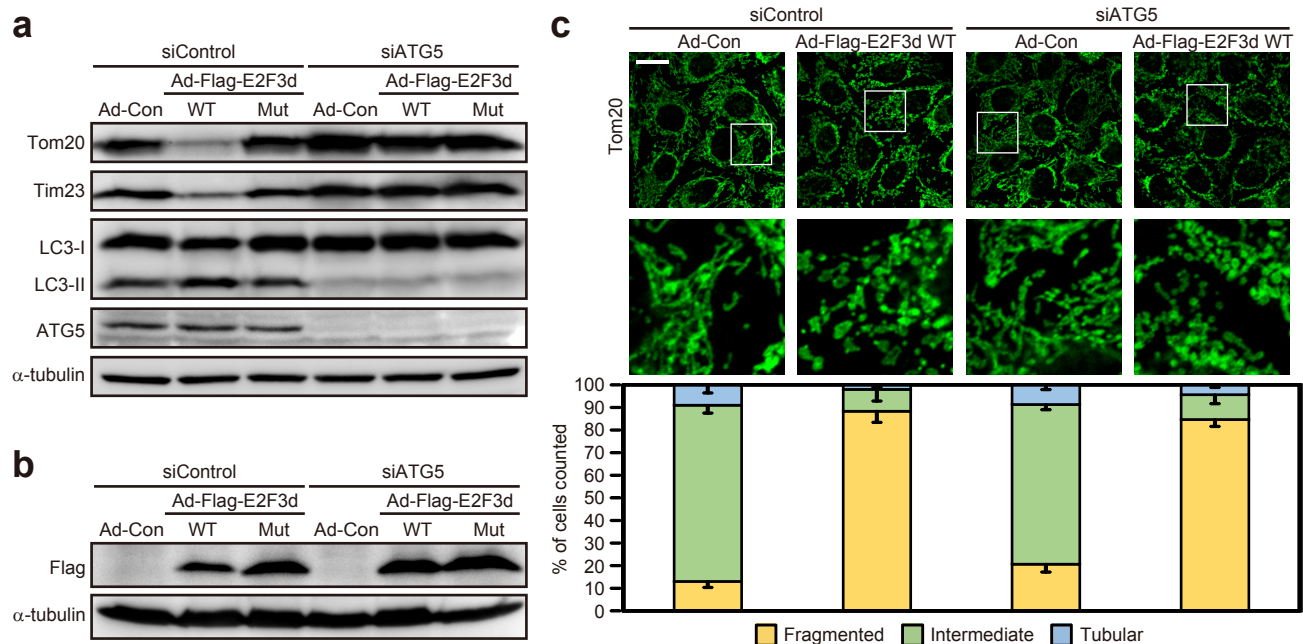

**Supplementary Figure 4.** E2F3d-induced mitophagy is dependent on ATG5. HeLa cells were transfected with control siRNA or siRNA against human *ATG5*. After 24 h, they were infected with control adenovirus (Ad-Con) or adenoviruses expressing Flag-tagged WT or LIR mutant E2F3d (Ad-Flag-E2F3d WT or Mut). **a** Cell lysates were examined by immunoblotting. **b** Cells were lysed directly in 1× Laemmli sample buffer and loaded onto SDS-polyacrylamide gels for immunoblotting. **c** Cells were immunostained with anti-Tom20 antibody. The bottom images show magnifications of the boxed areas in the top images. Scale bar, 20  $\mu$ m. The graph shows the percentage of cells exhibiting fragmented, intermediate, or tubular mitochondrial morphologies. Data are presented as the mean of three independent experiments ( $\geq 100$  cells). Error bars represent SD.

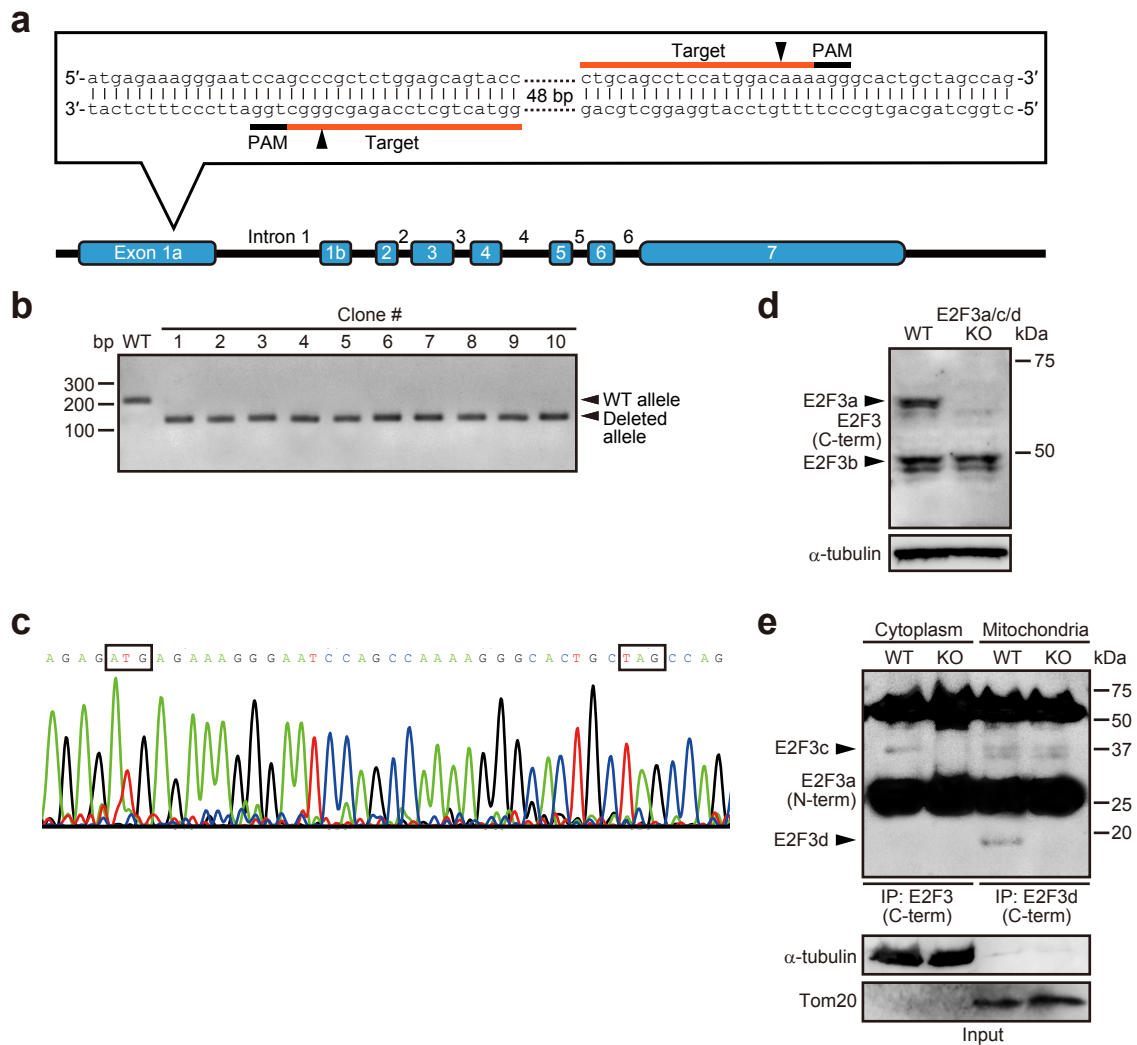

**Supplementary Figure 5.** The E2F3a/c/d KO cell line generated using the CRISPR/Cas9 system. **a** Schematic representing the design of the genome editing experiments for E2F3a/c/d KO. Arrowheads denote putative cleavage sites. **b** Genomic DNA was extracted from 10 single cell clones transfected with the PX459 plasmid expressing gRNAs against exon 1 of human *E2F3a* (exon 1a). PCR-based genotyping analysis was performed. Arrowheads indicate PCR products corresponding to the WT allele and exon 1a-deleted allele. WT shows genomic DNA from parental HeLa cells. **c** The PCR products in **b** were subjected to DNA sequencing to confirm the sequence of the potential deletion region. The translation initiation codon and in-frame stop codon are indicated in boxes. **d** Cell lysates from parental WT and E2F3a/c/d KO cells were examined by immunoblotting. **e** Cytoplasmic and mitochondrial lysates from parental WT and E2F3a/c/d KO cells were immunoprecipitated with the antibodies against the C-terminal domains of human E2F3a or E2F3d proteins, and probed with the antibody against the N-terminal domain of human E2F3a protein.

# Full-size scans of immunoblots

## Figure 1a

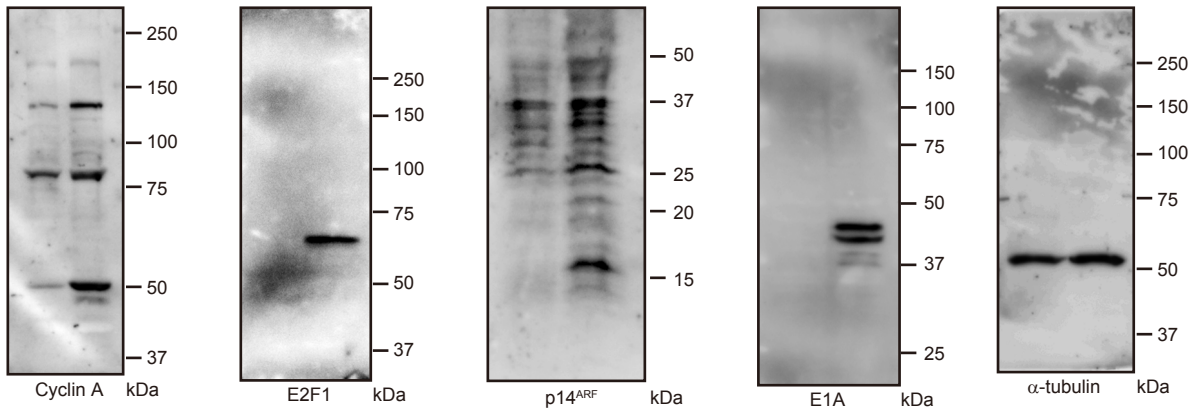

## Figure 2d

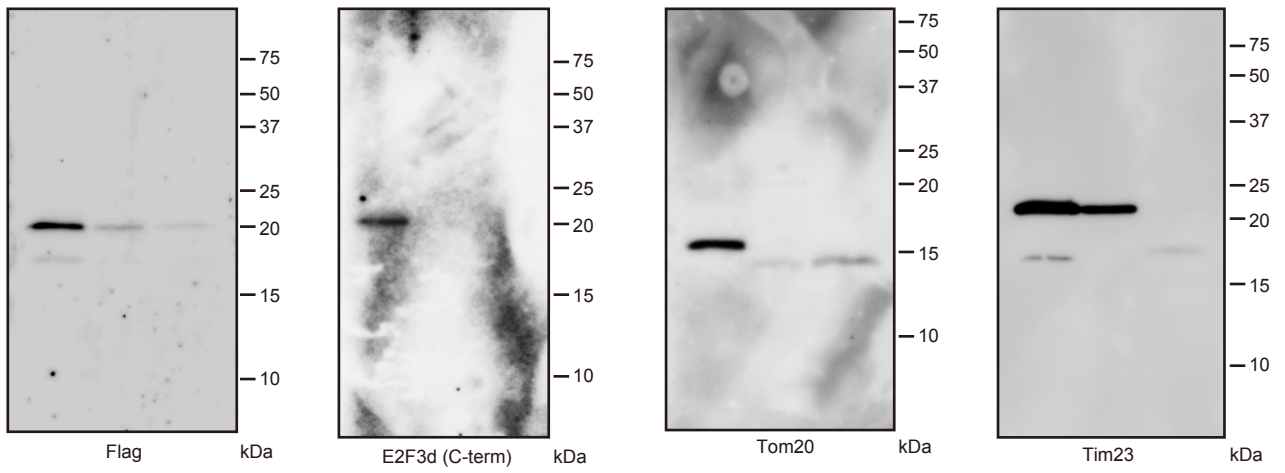

## Figure 3c

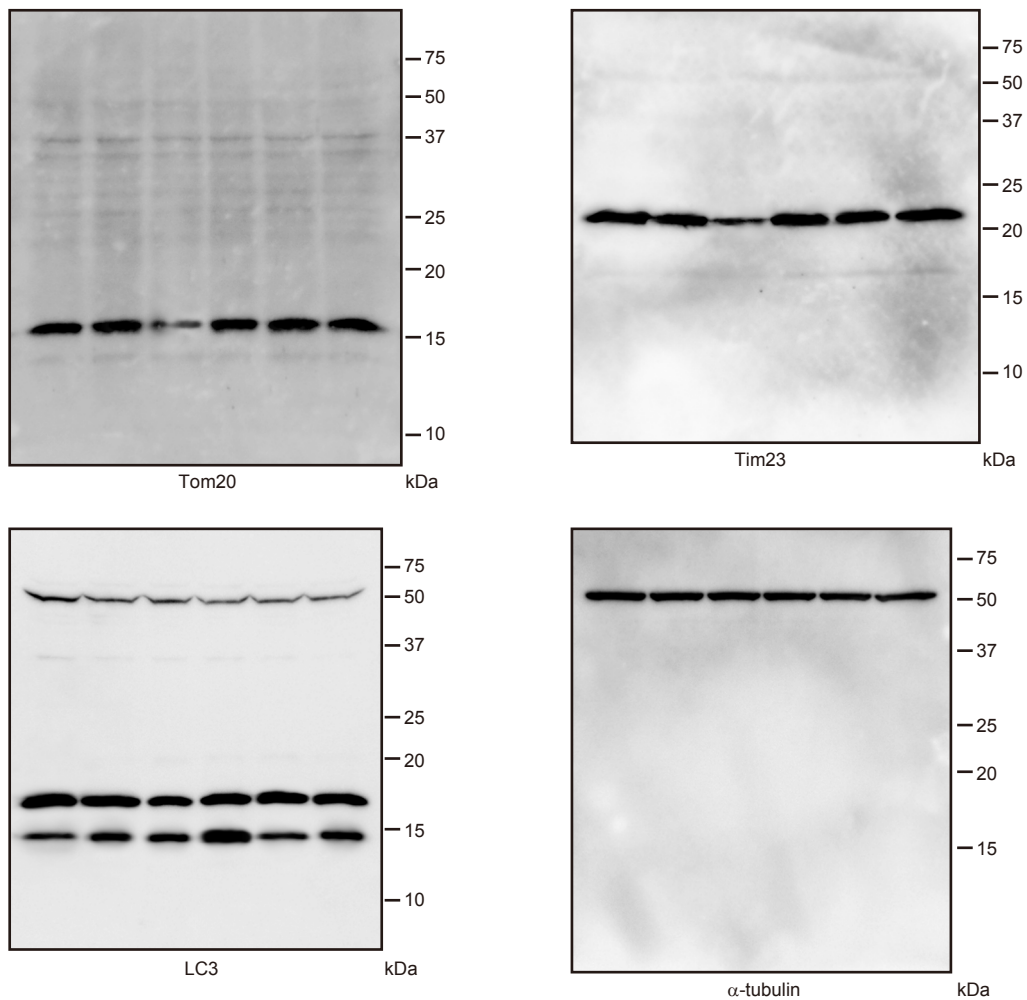

Figure 4a

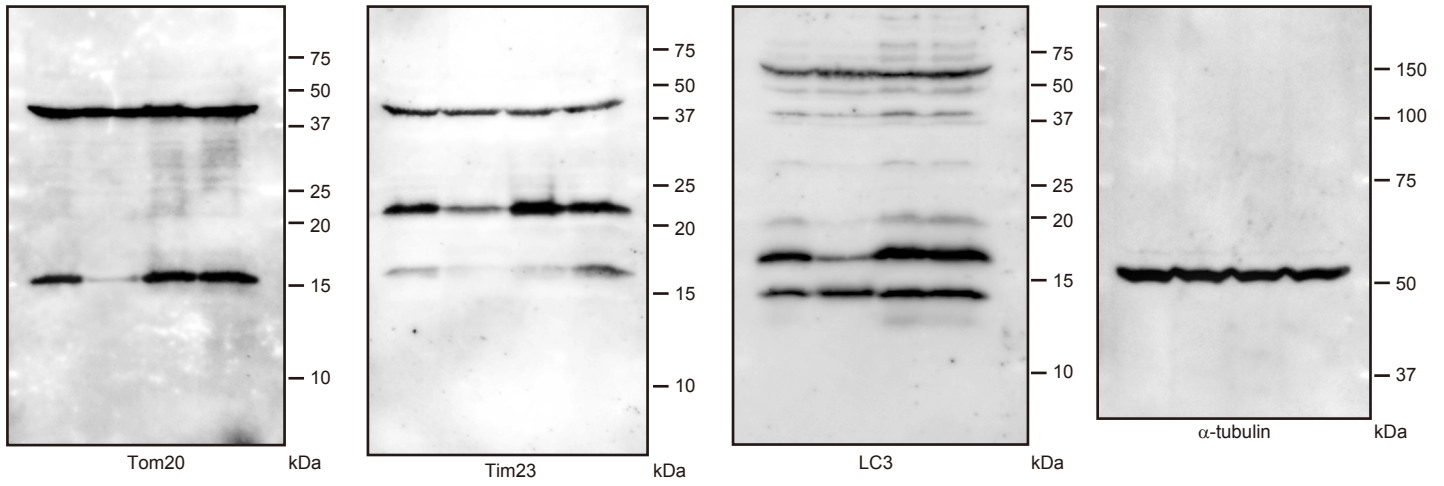

Figure 4b

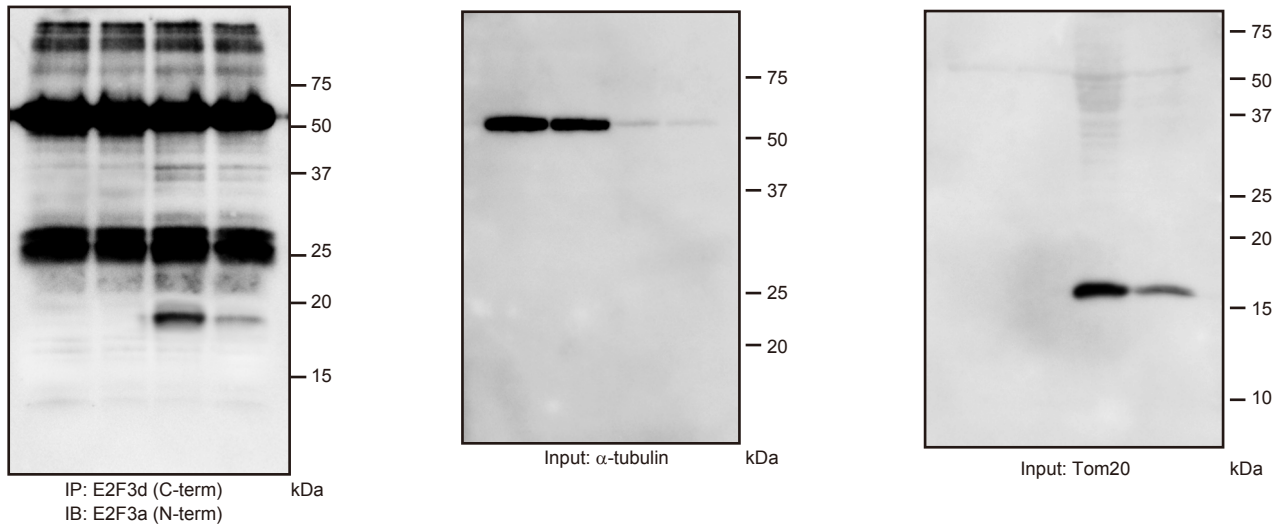

Figure 4d

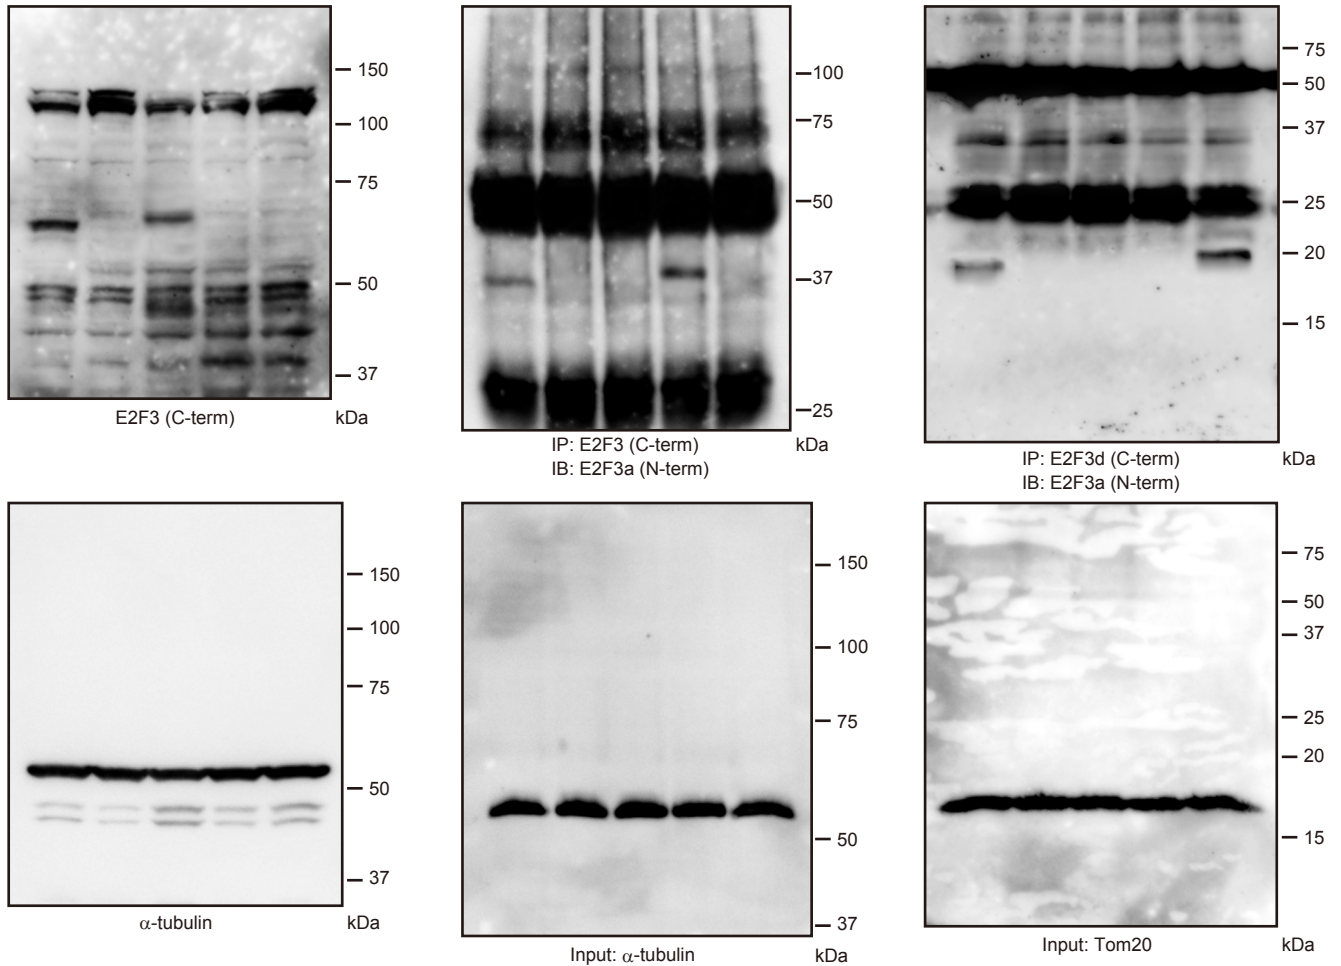

Figure 4e

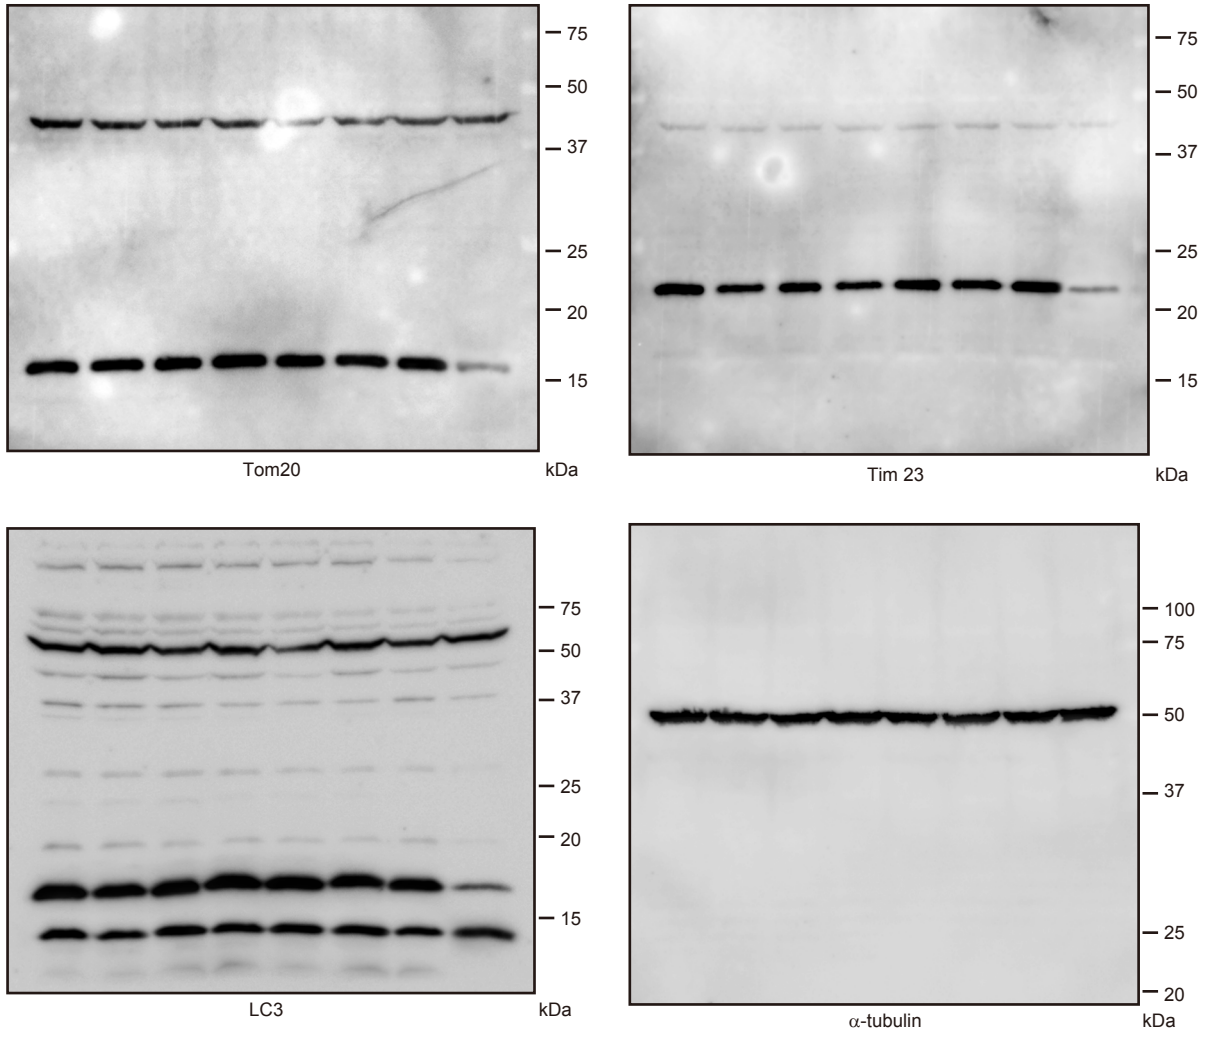

Figure 4f

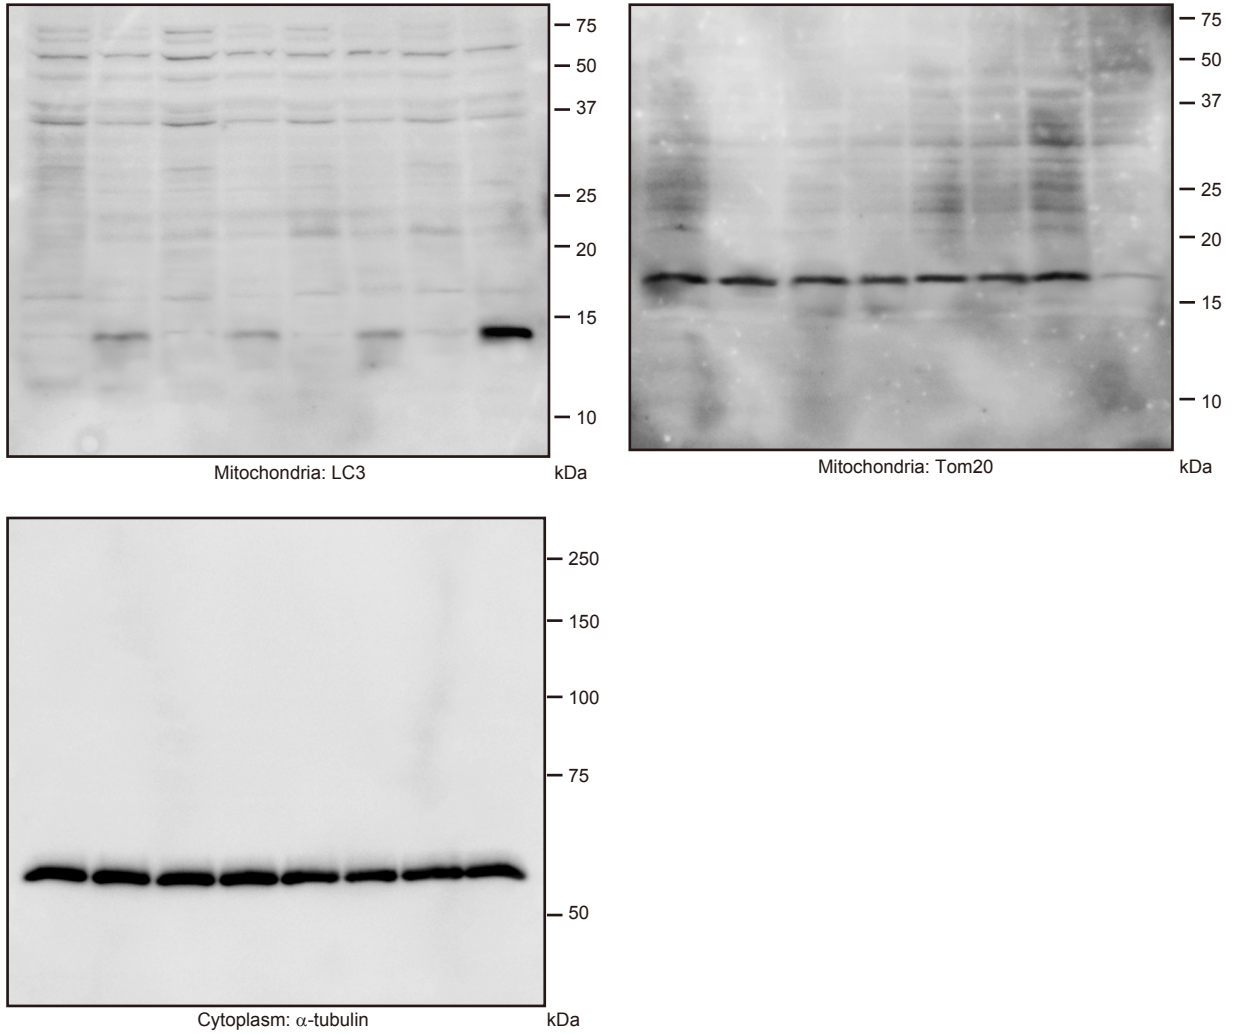



Supplementary Figure 2b

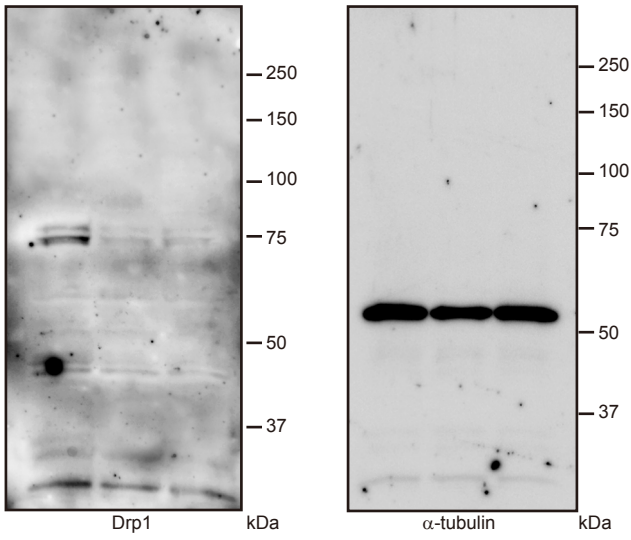

Supplementary Figure 2d

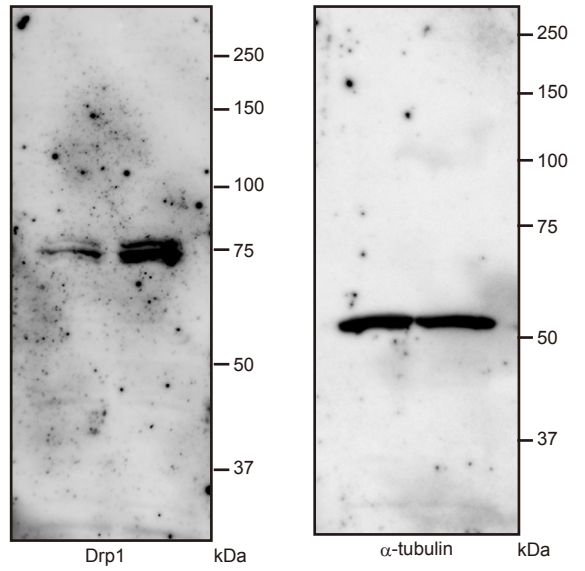

Supplementary Figure 3a

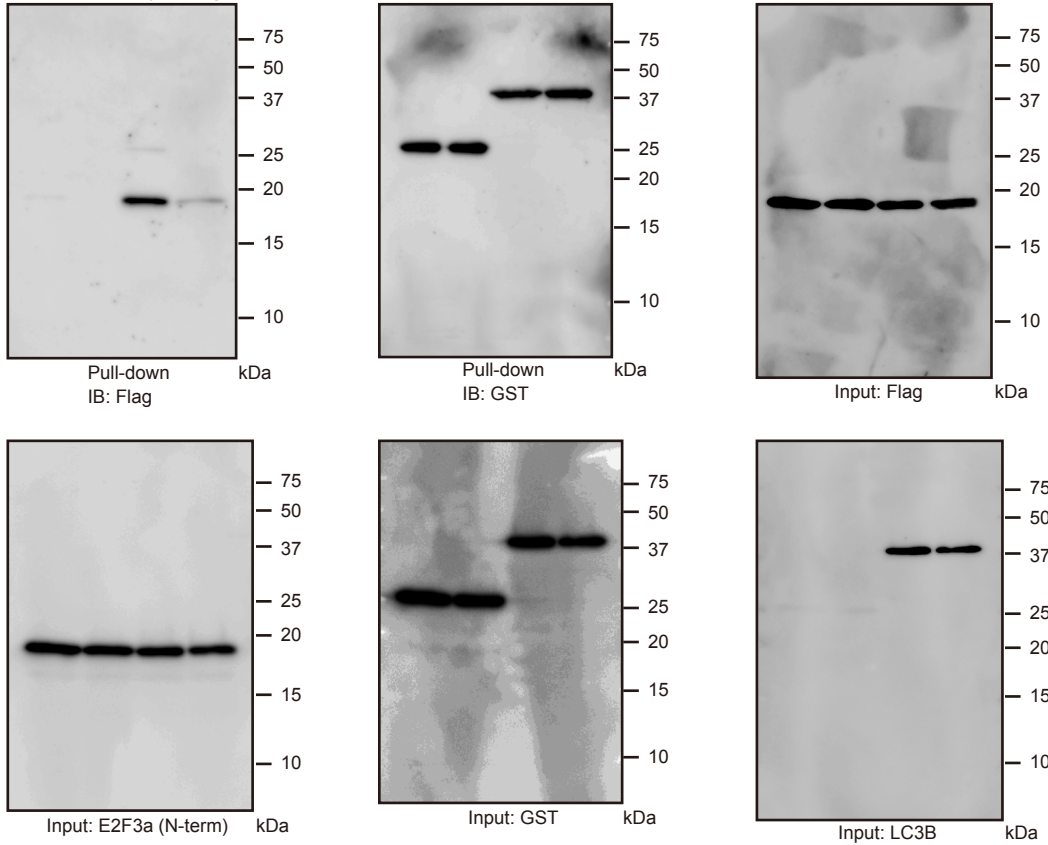

Supplementary Figure 3b

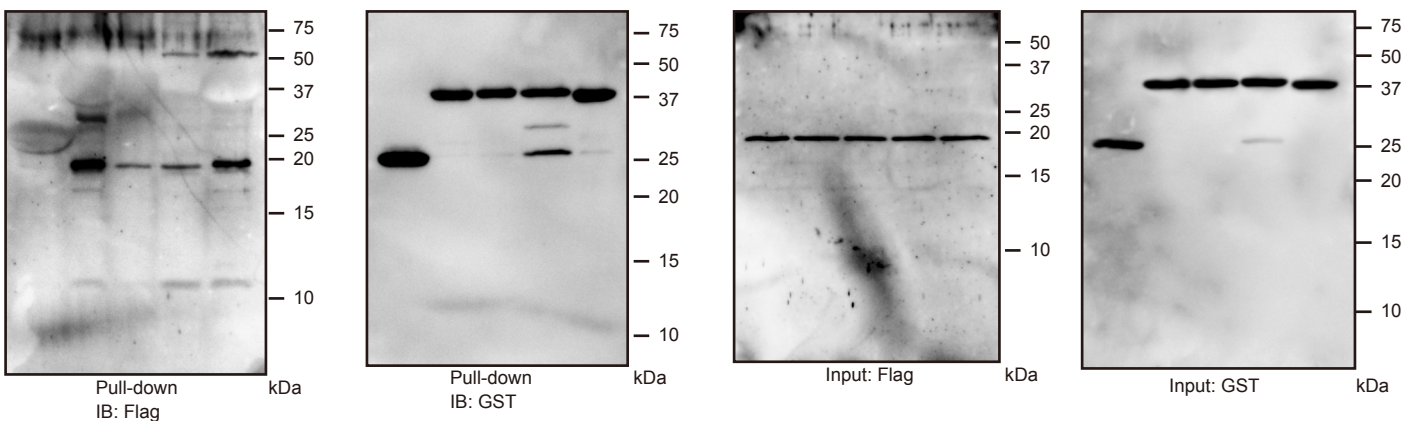

Supplementary Figure 4a

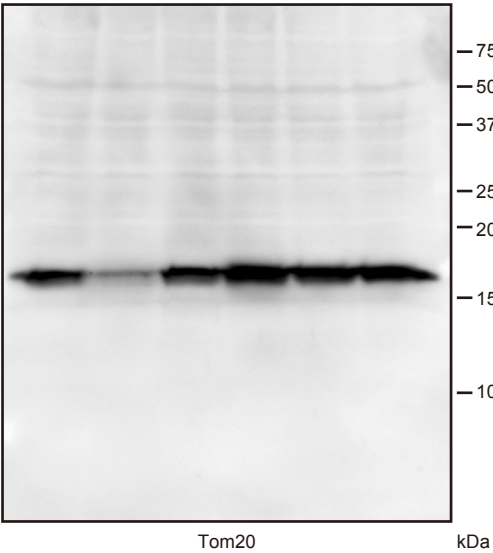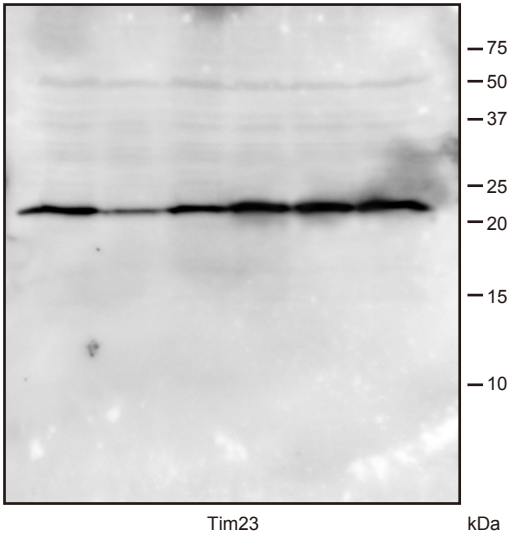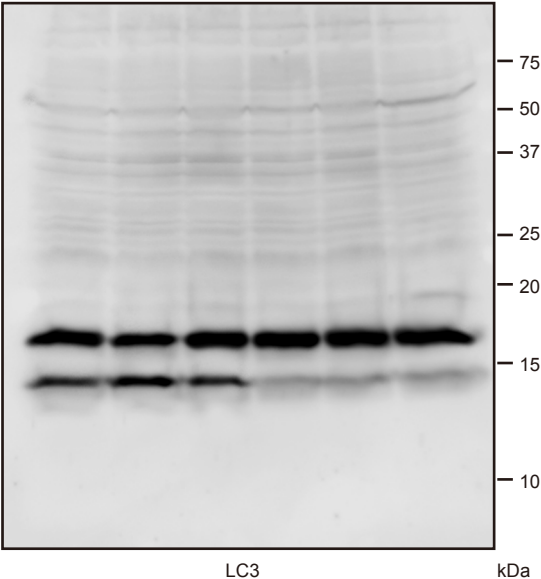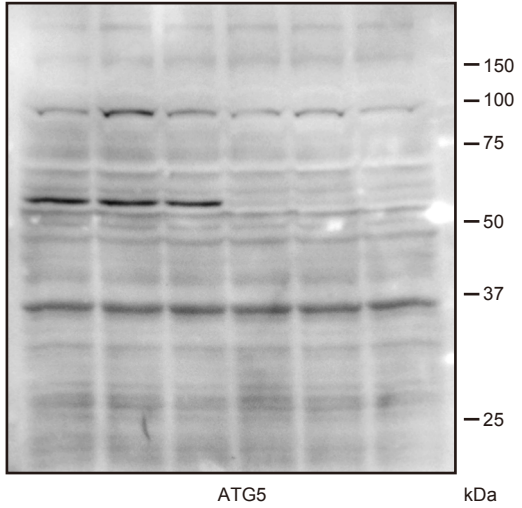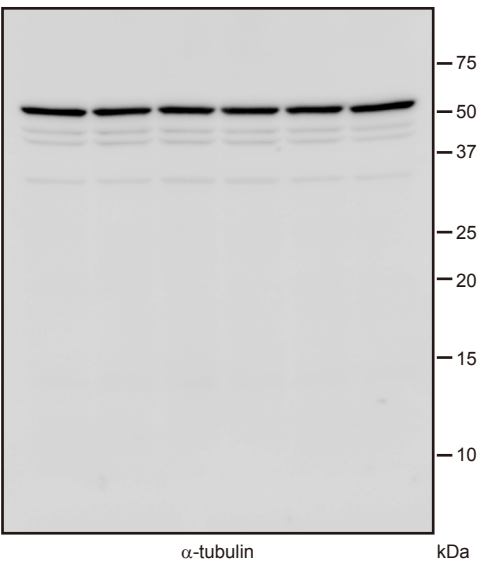

### Supplementary Figure 4b

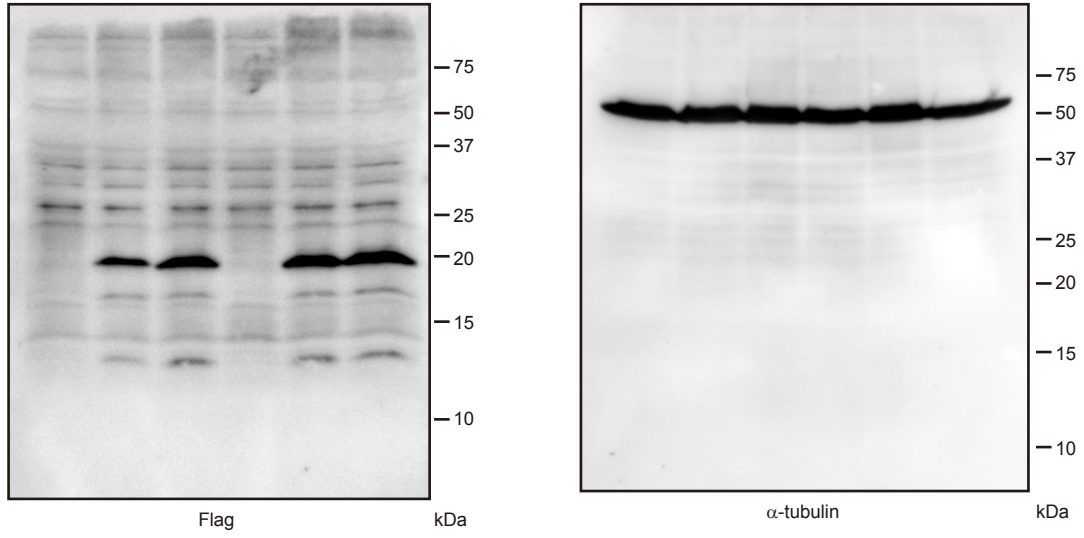

### Supplementary Figure 5d

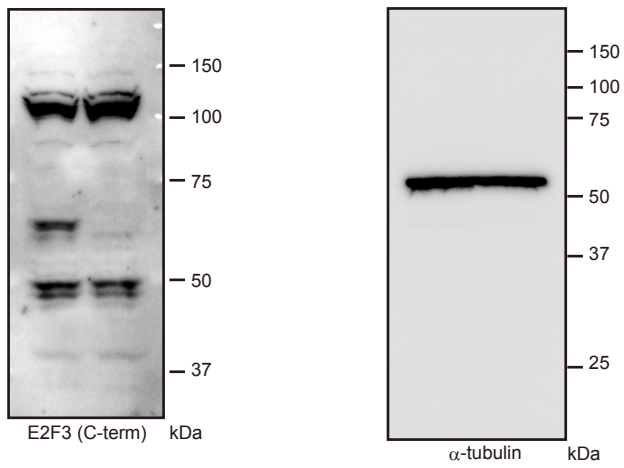

### Supplementary Figure 5e

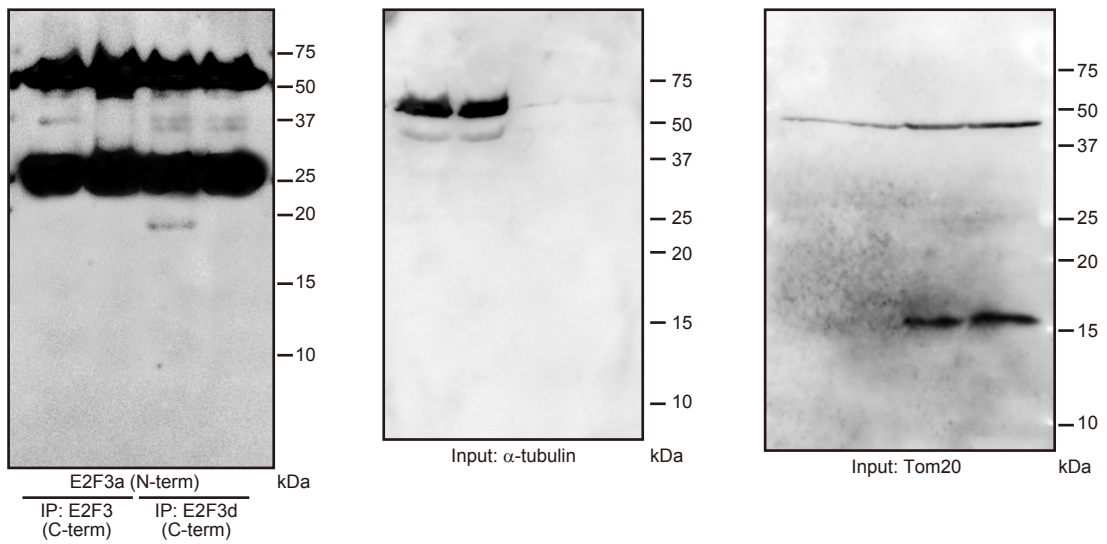

Supplement: 42003_2018_246_MOESM1_ESM.pdf [file 42003_2018_246_MOESM1_ESM.pdf]
